# Supplementary material for: Genome-wide divergence among invasive populations of Aedes aegypti in California
Source: PubMed Central journal article supplement (PMC6417271; doi:10.1186/s12864-019-5586-4), 2019-03-12

**A: GC2 (Menlo Park, Madera, and Fresno, N=9) vs GC3 (Clovis, N=7) :  $F_{ST}=0.129\pm 0.001$** 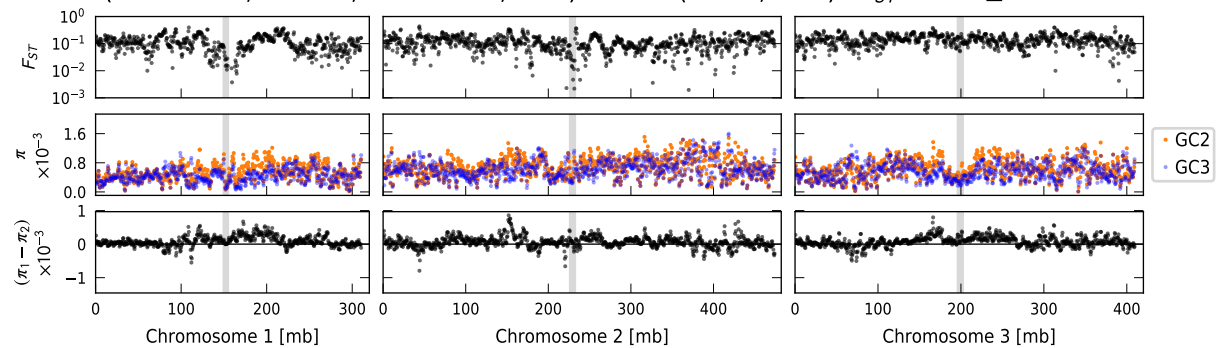**B: GC2 (Menlo Park, Madera, and Fresno, N=9) vs GC4 (South Africa, N=3) :  $F_{ST}=0.232\pm 0.002$** 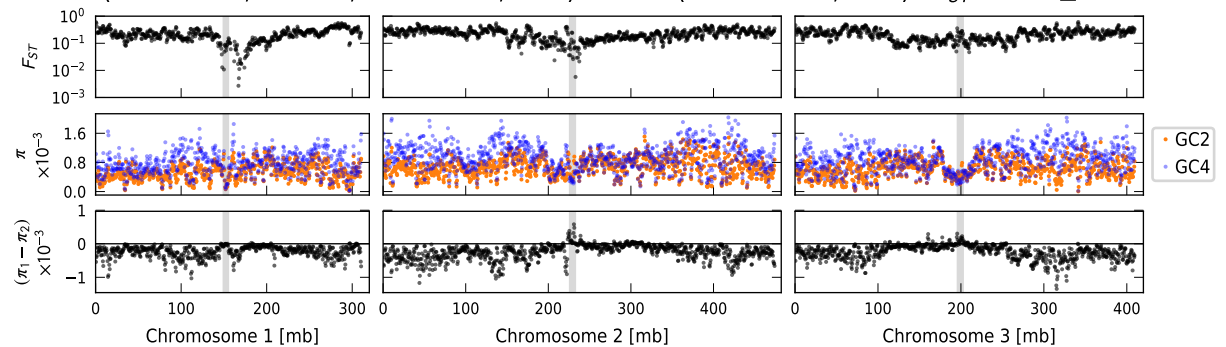**C: GC3 (Clovis, N=7) vs GC4 (South Africa, N=3) :  $F_{ST}=0.273\pm 0.002$** 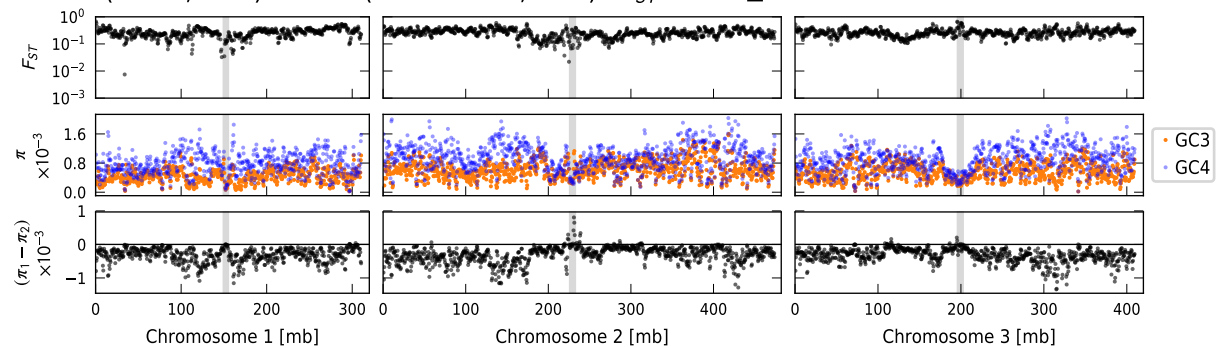**D: GC1 (Southern CA, N=18) vs GC1-B (Vero Beach, Exeter N=6) :  $F_{ST}=0.091\pm 0.001$** 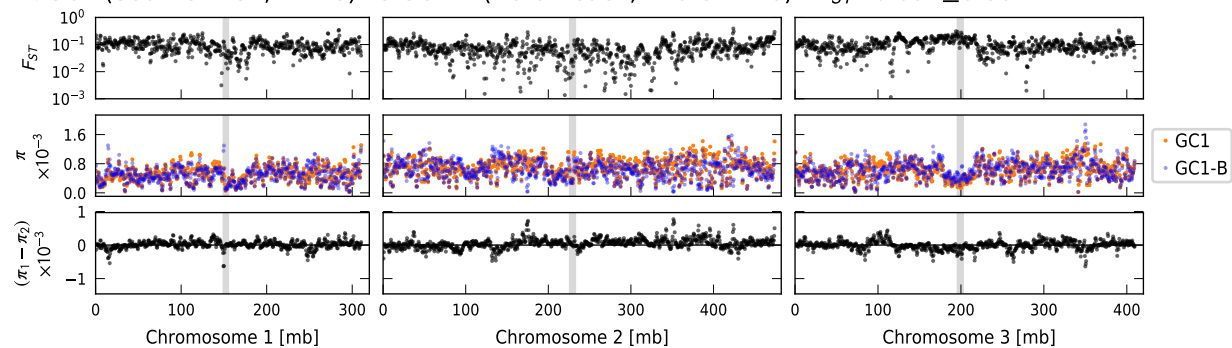

Supplement: 12864_2019_5586_MOESM3_ESM.pdf [file 12864_2019_5586_MOESM3_ESM.pdf]
